# Supplementary material for: Fabrication of nanoporous anodized aluminum oxide based photonic crystals with multi-band responses in the vis-NIR region
Source: Royal Society of Chemistry journal article supplement (doi:10.1039/d4nr04744c), 2024-12-29
Supplement: d4nr04744c1.pdf [file d4nr04744c1.pdf]

**Fabrication of Nanoporous Anodized Aluminum Oxide Based Photonic Crystals  
with Multi-band Responses in the vis-NIR Region**

*Mengqi Li<sup>1</sup>, Chao Feng<sup>1,\*</sup>, Liye Zhu<sup>1,2,3</sup>, Yan Zhao<sup>1,2,3,\*</sup>*

School of Physics and Optoelectronic Engineering, Beijing University of Technology,  
Beijing 100124, P. R. China

Key Laboratory of Trans-scale Laser Manufacturing Technology, Ministry of  
Education, Beijing 100124, P. R. China

Beijing Engineering Research Center of Laser Technology, Beijing University of  
Technology, Beijing 100124, P. R. China

\*Corresponding Author: E-mail: [fengchaoholy@bjut.edu.cn](mailto:fengchaoholy@bjut.edu.cn), [zhaoyan@bjut.edu.cn](mailto:zhaoyan@bjut.edu.cn)

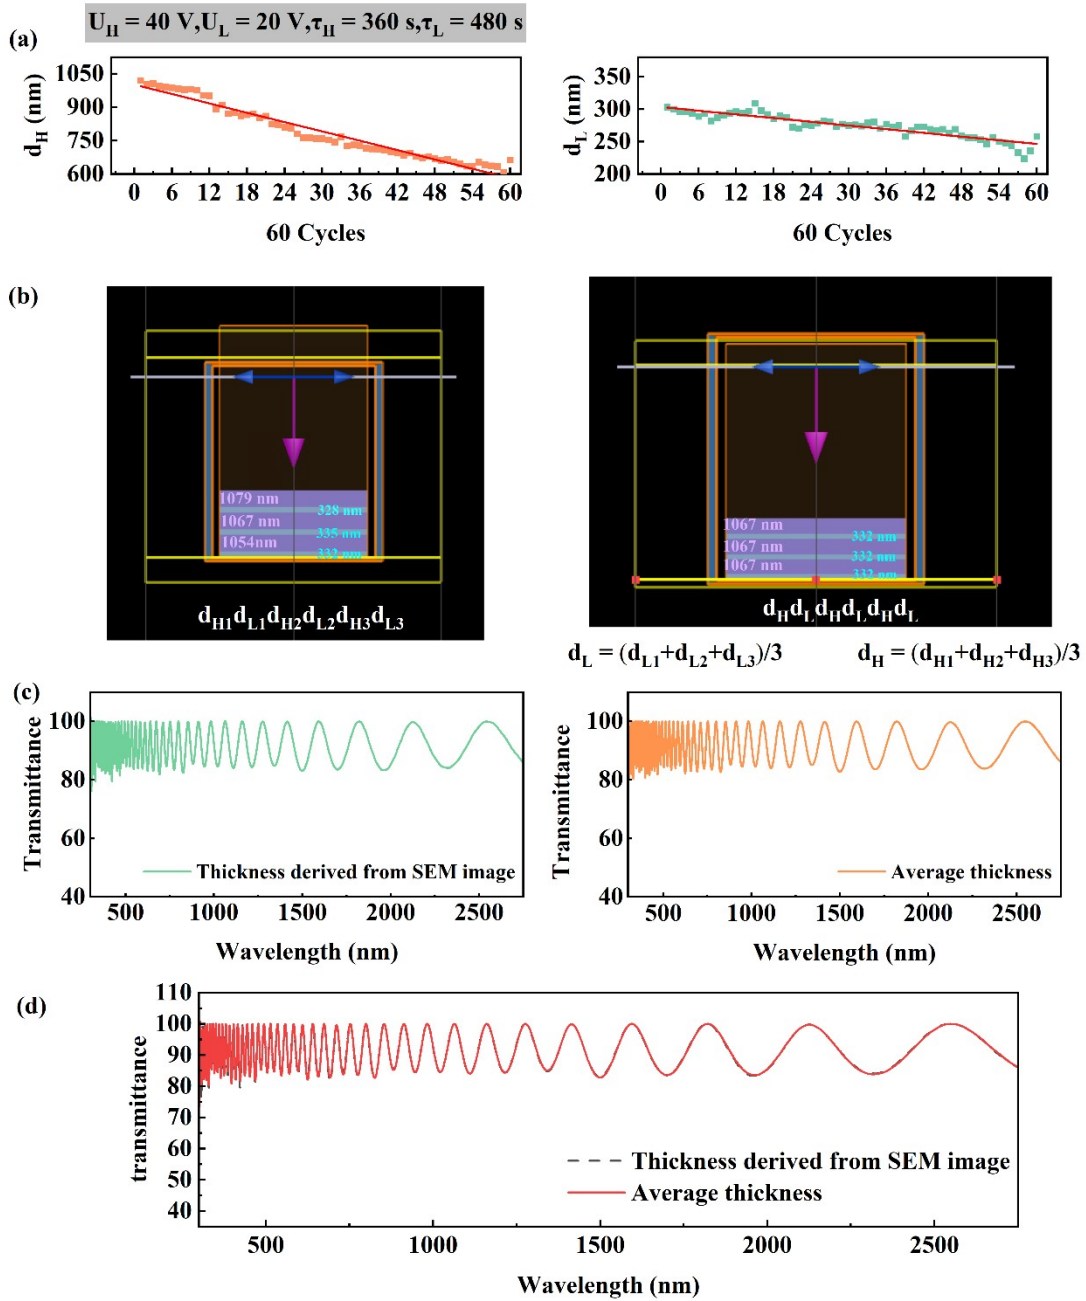

**Figure S1.** (a) The variation of 60-layer AAO-based PC thickness ( $U_H$  and  $U_L$  layer). (b) FDTD simulation models. The first one includes three cycles of AAO-based PC with varied layer thickness ( $d_{H1}$  &  $d_{L1}$ ,  $d_{H2}$  &  $d_{L2}$ ,  $d_{H3}$  &  $d_{L3}$ ) and the other one includes three cycles of AAO-based PC with the same layer thickness ( $d_H$  &  $d_L$ ), where the  $d_H$  and  $d_L$  are the average value of ( $d_{H1}$ ,  $d_{H2}$ ,  $d_{H3}$ ) and ( $d_{L1}$ ,  $d_{L2}$ ,  $d_{L3}$ ); (c) The transmittance spectra from FDTD models in (b); (d) Consolidated diagram of (c).

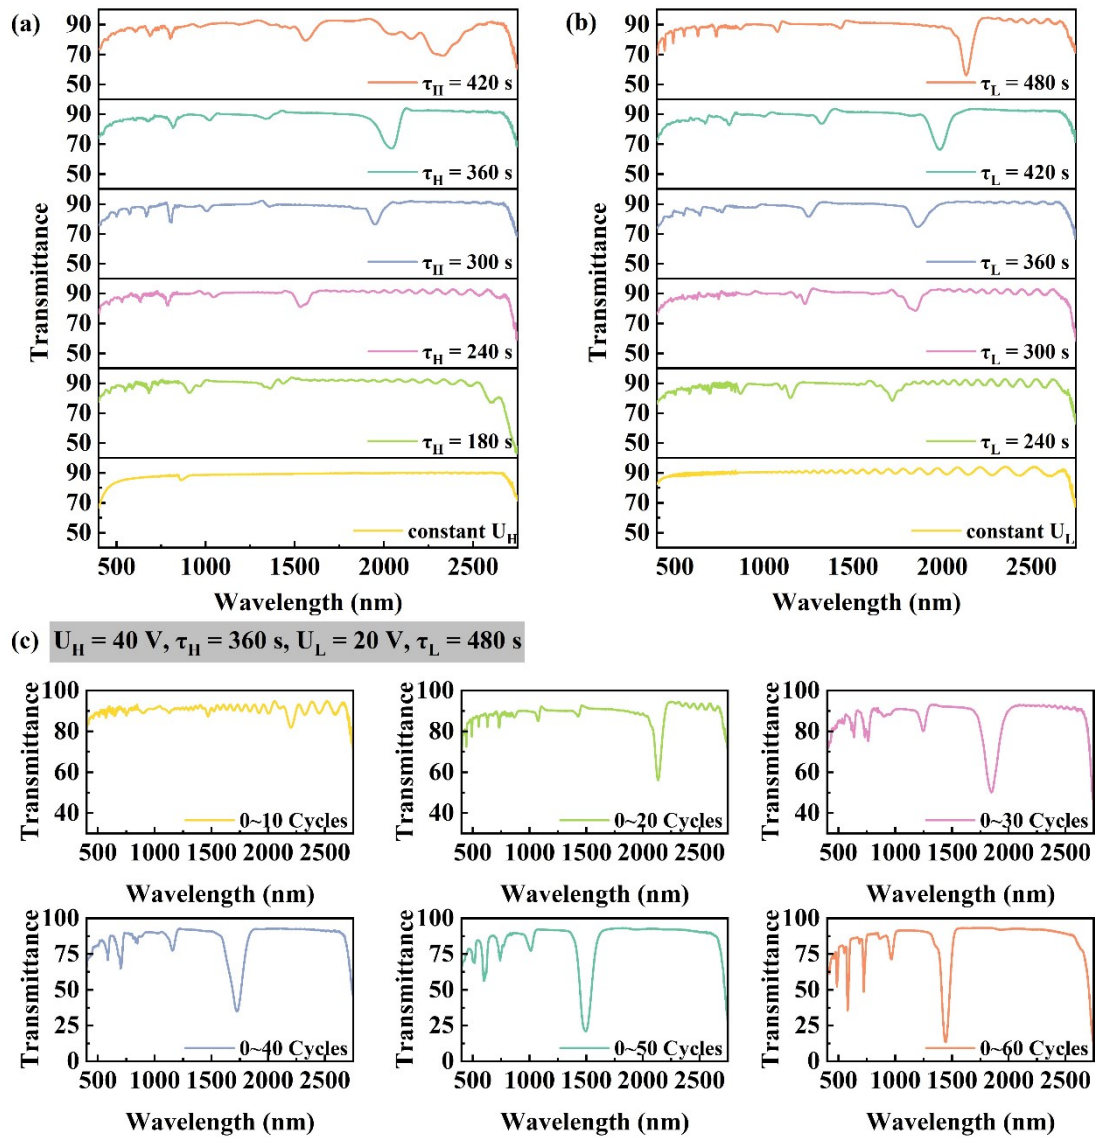

**Figure S2.** The entire transmission spectra of AAO-based PC. (a) The AAO-based PC transmission spectra of high voltage duration ( $\tau_H$ ),  $\tau_H = 180$  s,  $240$  s,  $300$  s,  $360$  s,  $420$  s. (b) The AAO-based PC transmission spectra of low voltage duration ( $\tau_L$ ),  $\tau_L = 240$  s,  $300$  s,  $360$  s,  $420$  s,  $480$  s. (c) The AAO-based PC transmission spectra of different cycle numbers,  $N = 10, 20, 30, 40, 50, 60$ .

**Table S1.** Table of structural parameters of AAO-based PC prepared with different high and low pulse durations. Total AAO-based PC thickness ( $d$ ), high and low pore layers thicknesses ( $d_H$ ) ( $d_L$ ), mean ( $d_{Ha}$ ) ( $d_{La}$ ), median ( $d_{Hm}$ ) ( $d_{Lm}$ ), fitted values of the thicknesses of the high and low pore layers ( $d_{Hf}$ ) ( $d_{Lf}$ ), median ( $d_{Hfm}$ ) ( $d_{Lfm}$ ). The first five rows in the Table S1 are the AAO-based PC thickness data when the duration of high voltage 40 V is 180 s, 240 s, 300 s, 360 s, 420 s, respectively (Note:  $U_L=20$  V and constant 480 s,  $N=20$ ); the last five rows in the Table S1 are the AAO-based PC thickness data when the duration of low voltage 20 V is 240 s, 300 s, 360 s, 420 s, 480 s, respectively (Note:  $U_H=40$  V and constant 360 s,  $N=20$ ).

|             | Anodizing duration /s | $d$ / $\mu\text{m}$ | $d_H$ /nm | $d_L$ /nm | ( $d_{Ha}$ / $d_{Hm}$ ) /nm | ( $d_{La}$ / $d_{Lm}$ ) /nm | $d_{Hf}$ /nm  | $d_{Lf}$ /nm | $d_{Hfm}$ /nm | $d_{Lfm}$ /nm |
|-------------|-----------------------|---------------------|-----------|-----------|-----------------------------|-----------------------------|---------------|--------------|---------------|---------------|
| <b>40 V</b> | 180                   | 19.2                | 534~613   | 306~351   | 559.1/549.5                 | 331.4/330.5                 | 541.1~601.3   | 324.9~347.2  | 551.7         | 329.4         |
|             | 240                   | 20.2                | 577~766   | 241~353   | 672.5/674                   | 306.3/304                   | 580.7~758.1   | 287.4~357.3  | 674.4         | 298.8         |
|             | 300                   | 26.9                | 820~1033  | 321~383   | 947.15/934                  | 356.1/363                   | 902.1~966.3   | 319.2~380.0  | 955.2         | 359.9         |
|             | 360                   | 29.0                | 990~1132  | 329~367   | 1046.4/1054.5               | 347.3/344                   | 1003.3~1094.2 | 335.9~368.7  | 1045.1        | 344.4         |
|             | 420                   | 30.1                | 955~1467  | 306~383   | 1155.3/1121                 | 335.9/331                   | 962.1~1444.0  | 307.8~381.7  | 1127.6        | 330.7         |
| <b>20 V</b> | 240                   | 20.8                | 732~955   | 133~184   | 830.2/836                   | 152.2/146.5                 | 735.7~897.6   | 138.6~189.0  | 838.0         | 146.2         |
|             | 300                   | 22.8                | 829~1021  | 167~251   | 927.9/930                   | 200.2/201                   | 808.0~1001.8  | 173.8~226.3  | 941.1         | 200.3         |
|             | 360                   | 24.8                | 875~1029  | 221~278   | 939.3/922.5                 | 239.4/236.5                 | 874.1~1038.1  | 224.5~270.4  | 929.6         | 234.6         |
|             | 420                   | 27.6                | 977~1103  | 294~332   | 1010/994                    | 311.7/311                   | 982.3~1076.5  | 295.5~322.9  | 997.8         | 313.1         |
|             | 480                   | 29.7                | 1029~1111 | 338~368   | 1054.1/1043.5               | 350.7/350                   | 1028.2~1086.1 | 344.0~367.0  | 1052.2        | 348.7         |

**Table S2.** AAO-based PC spectral data table. Photon band gap positions ( $\lambda_1, \lambda_2$ ), transmittance variation ( $\Delta T$ ), half-height width (FWHM) obtained from experiments and simulations of AAO-based PC, as well as the standard deviation (SD) of experimental and simulated data. The first five rows of Table S2 show the AAO-based PC spectral data for high voltage 40 V durations of 180 s, 240 s, 300 s, 360 s, and 420 s, respectively (Note:  $U_L=20$  V,  $N=20$ ); the last five rows of the Table S2 show the AAO-based PC spectral data for low voltage 20 V durations of 240 s, 300 s, 360 s, 420 s, and 480 s, respectively. AAO photonic crystal spectral data (Note:  $U_H=40$  V,  $N=20$ ).

|            | Anodizing duration /s | $\lambda_1$ /nm | $\lambda_2$ /nm | $\Delta T$ | FWHM /nm ( $\lambda_1$ ) | $\lambda_1$ /nm (FDTD) | $\lambda_1$ /nm (FDTD) | SD /nm ( $\lambda_1$ ) | SD /nm ( $\lambda_2$ ) |
|------------|-----------------------|-----------------|-----------------|------------|--------------------------|------------------------|------------------------|------------------------|------------------------|
|            | 180                   | 1359            | 909             | 2.29       | 60.2                     | 1368.1                 | 897.2                  | 6.4                    | 8.4                    |
|            | 240                   | 1532.5          | 1043.5          | 2.44       | 77.7                     | 1502.7                 | 999.1                  | 21.1                   | 31.4                   |
| <b>40V</b> | 300                   | 1949            | 1359.5          | 1.76       | 67.3                     | 1998.5                 | 1328.4                 | 35.0                   | 22.0                   |
|            | 360                   | 2043.5          | 1338            | 1.40       | 111.8                    | 2136.7                 | 1419.7                 | 65.9                   | 57.7                   |
|            | 420                   | 2328.5          | 1560.5          | 1.00       | 290.1                    | 2235.7                 | 1517.6                 | 65.6                   | 30.3                   |
|            | 240                   | 1719.5          | 1146.5          | 2.03       | 62.1                     | 1492.1                 | --                     | 160.8                  | --                     |
|            | 300                   | 1849            | 1228.5          | 1.56       | 86.4                     | 1690.2                 | 1148.2                 | 112.3                  | 56.8                   |
| <b>20V</b> | 360                   | 1862.5          | 1249.5          | 1.18       | 98.0                     | 1766.2                 | 1199.8                 | 68.3                   | 35.3                   |
|            | 420                   | 1985            | 1338            | 0.9        | 95.5                     | 1981.2                 | 1346.0                 | 2.7                    | 5.6                    |
|            | 480                   | 2134.5          | 1430.5          | 1.00       | 66.8                     | 2153.4                 | 1430.7                 | 13.4                   | 0.2                    |

**Table S3.** AAO-based PC layer thickness variation with the number of cycles. Total AAO-based PC thickness ( $d$ ), high and low pore layer thicknesses ( $d_H$ ,  $d_L$ ), mean high and low pore layer thicknesses ( $d_{Ha}$ ,  $d_{La}$ ), intermediate values ( $d_{Hm}$ ,  $d_{Lm}$ ), fitted values ( $d_{Hf}$ ,  $d_{Lf}$ ), fitted intermediate values ( $d_{Hfm}$ ,  $d_{Lfm}$ ), and fitted intermediate values ( $d_{Hfm}$ ,  $d_{Lfm}$ ). Note:  $U_H = 40$  V,  $U_L = 20$  V.

| Anodizing Periods | $d / \mu\text{m}$ | $d_H / \text{nm}$ | $d_L / \text{nm}$ | $(d_{Ha} / d_{Hm}) / \text{nm}$ | $(d_{La} / d_{Lm}) / \text{nm}$ | $d_{Hf} / \text{nm}$ | $d_{Lf} / \text{nm}$ | $d_{Hfm} / \text{nm}$ | $d_{Lfm} / \text{nm}$ |
|-------------------|-------------------|-------------------|-------------------|---------------------------------|---------------------------------|----------------------|----------------------|-----------------------|-----------------------|
| 10                | 14.0              | 946~1093          | 290~350           | 1019.5/1026                     | 320.6/325                       | 936.5~1103           | 314.2~351.4          | 1019.3                | 314.4                 |
| 20                | 29.7              | 1029~1111         | 338~368           | 1054.1/1043.5                   | 350.7/350                       | 1028.2~1086.1        | 344.0~367.0          | 1052.2                | 348.7                 |
| 30                | 37.9              | 745~1087          | 255~344           | 919.5/908.5                     | 297.5/297.5                     | 780.8~1079.7         | 271.1~335.5          | 913.6                 | 294.4                 |
| 40                | 44.7              | 640~963           | 238~314           | 805.6/786.5                     | 282.6/285                       | 676.6~932.6          | 257.6~306.6          | 806.2                 | 282.8                 |
| 50                | 52.3              | 643~930           | 231~290           | 756.1/749                       | 264.1/268.5                     | 662.7~917.3          | 238.5~284.3          | 738.2                 | 265.5                 |
| 60                | 57.6              | 659~990           | 230~309           | 785.9/747                       | 280.8/284.5                     | 684.7~1004.7         | 248.1~293.7          | 754.7                 | 286.4                 |

**Table S4.** Table of experimentally measured AAO-based PC spectral data. Photonic band gap positions ( $\lambda_1$ ,  $\lambda_2$ ), transmittance ( $\Delta T$ ), and half-height width (FWHM) were obtained from experiments and simulations of AAO-based PC, as well as the standard deviation (SD) of experimental and simulated data. The number of anodizing cycles was varied, at which time  $U_H = 40$  V duration of 360 s and  $U_L = 20$  V duration of 480 s.

| Anodizing Periods | $\lambda_1/\text{nm}$ | $\lambda_2/\text{nm}$ | $\Delta T$ | FWHM/nm ( $\lambda_1$ ) | FWHM/nm ( $\lambda_2$ ) | $\lambda_1/\text{nm}$ (FDTD) | $\lambda_2/\text{nm}$ (FDTD) | SD/nm ( $\lambda_1$ ) | SD/nm ( $\lambda_2$ ) |
|-------------------|-----------------------|-----------------------|------------|-------------------------|-------------------------|------------------------------|------------------------------|-----------------------|-----------------------|
| 10                | 2198.5                | 1470.5                | 1.00       | 65.57                   | 29.0                    | 2180.8                       | 1441.2                       | 8.9                   | 20.7                  |
| 20                | 2134.5                | 1430.5                | 2.43       | 66.8                    | 43.9                    | 2158.5                       | 1430.7                       | 17.0                  | 0.2                   |
| 30                | 1846.5                | 1247.0                | 2.76       | 128.9                   | 57.6                    | 1946.2                       | 1238.1                       | 70.5                  | 6.3                   |
| 40                | 1725.5                | 1158.0                | 3.60       | 127.8                   | 49.4                    | 1654.6                       | 1107.0                       | 50.2                  | 36.0                  |
| 50                | 1495.0                | 1012.0                | 4.36       | 114.8                   | 53.3                    | 1551.0                       | 1037.7                       | 39.6                  | 18.2                  |
| 60                | 1443.5                | 965.0                 | 4.79       | 76.8                    | 40.2                    | 1459.6                       | 976.2                        | 11.4                  | 7.9                   |
